# Supplementary material for: Virtual screening of phytochemicals from Indian medicinal plants against the endonuclease domain of SFTS virus L polymerase
Source: RSC Adv. 2022 Feb 22;12(10):6234–47. doi: 10.1039/d1ra06702h (PMC8982020; doi:10.1039/d1ra06702h)
Supplement: RA-012-D1RA06702H-s002 [file RA-012-D1RA06702H-s002.xlsx]

## Sheet: Summary
Supplementary Information Tables S1-S3 for Virtual screening of phytochemicals from Indian medicinal plants against endonuclease domain of SFTS Virus L polymerase R. P. Vivek-Ananth a,b, Ajaya Kumar Sahoo a,b, Ashutosh Srivastava c,*, Areejit Samal a,b,* a The Institute of Mathematical Sciences (IMSc), Chennai 600113, India b Homi Bhabha National Institute (HBNI), Mumbai 400094, India c Disciplin…

## Sheet: Table S1
Table S1: List of 26 phytochemical hits identified at the end of stage 3 of the virtual screening workflow. For each of the 26 hits, the table gives the PubChem chemical identifier, binding energy with the prepared crystal structure of the endoN obtained from molecular docking, chemical name, IUPAC name, chemical structure in SMILES format and predicted chemical classification from ClassyFire.
Serial number	PubChem chemical identifier	Docking binding energy (kcal/mol)	Chemical name	IUPAC name	SMILES	Predicted chemical classification from ClassyFire
						Kingdom	Super-class	Class	Sub-class
1	CID:13116441	-23.44	1,3,4-Pentanetricarboxylic acid	1-methylbutane-1,2,4-tricarboxylic acid	OC(=O)CC[C@H]([C@H](C(=O)O)C)C(=O)O	Organic compounds	Organic acids and derivatives	Carboxylic acids and derivatives	Tricarboxylic acids and derivatives
2	CID:161197	-22.01	gamma-glutamylaspartic acid	(2S)-2-[[(4S)-4-amino-4-carboxybutanoyl]amino]butanedioic acid	O=C(N[C@H](C(=O)O)CC(=O)O)CC[C@@H](C(=O)O)N	Organic compounds	Organic acids and derivatives	Carboxylic acids and derivatives	Amino acids, peptides, and analogues
3	CID:11953815	-21.41	Sinapoyl malate	(2S)-2-[(E)-3-(4-hydroxy-3,5-dimethoxyphenyl)prop-2-enoyl]oxybutanedioic acid	COc1cc(/C=C/C(=O)O[C@H](C(=O)O)CC(=O)O)cc(c1O)OC	Organic compounds	Phenylpropanoids and polyketides	Cinnamic acids and derivatives	Hydroxycinnamic acids and derivatives
4	CID:5281218	-21.23	Vulgaxanthin-II	(2S)-4-[(E)-2-[[(1S)-1,3-dicarboxypropyl]amino]ethenyl]-2,3-dihydropyridine-2,6-dicarboxylic acid	OC(=O)CC[C@@H](C(=O)O)N/C=C/C1=CC(=N[C@@H](C1)C(=O)O)C(=O)O	Organic compounds	Organic acids and derivatives	Carboxylic acids and derivatives	Amino acids, peptides, and analogues
5	CID:189811	-20.99	2'-deoxymugineic acid	(2S)-1-[(3S)-3-carboxy-3-[[(3S)-3-carboxy-3-hydroxypropyl]amino]propyl]azetidine-2-carboxylic acid	O[C@H](C(=O)O)CCN[C@H](C(=O)O)CCN1CC[C@H]1C(=O)O	Organic compounds	Organic acids and derivatives	Carboxylic acids and derivatives	Amino acids, peptides, and analogues
6	CID:16070023	-20.88	Avenic acid A	(2S)-4-[[(1S)-1-carboxy-3-hydroxypropyl]amino]-2-[[(3S)-3-carboxy-3-hydroxypropyl]amino]butanoic acid	OCC[C@@H](C(=O)O)NCC[C@@H](C(=O)O)NCC[C@@H](C(=O)O)O	Organic compounds	Organic acids and derivatives	Carboxylic acids and derivatives	Amino acids, peptides, and analogues
7	CID:135438592	-20.8	Miraxanthin-II	(4E)-4-[2-(1,2-dicarboxyethylimino)ethylidene]-2,3-dihydro-1H-pyridine-2,6-dicarboxylic acid	OC(=O)C[C@H](C(=O)O)/N=C/C=C/1\C[C@@H](NC(=C1)C(=O)O)C(=O)O	Organic compounds	Organic acids and derivatives	Carboxylic acids and derivatives	Amino acids, peptides, and analogues
8	CID:440380	-20.45	Homoglutathione	(2S)-2-amino-5-[[(2R)-1-(2-carboxyethylamino)-1-oxo-3-sulfanylpropan-2-yl]amino]-5-oxopentanoic acid	SC[C@@H](C(=O)NCCC(=O)O)NC(=O)CC[C@@H](C(=O)O)N	Organic compounds	Organic acids and derivatives	Peptidomimetics	Hybrid peptides
9	CID:11954190	-20.19	3-epi-3-hydroxy-2'-deoxymugineic acid	(2S,3S)-1-[(3S)-3-carboxy-3-[[(3S)-3-carboxy-3-hydroxypropyl]amino]propyl]-3-hydroxyazetidine-2-carboxylic acid	O[C@H](C(=O)O)CCN[C@H](C(=O)O)CCN1C[C@@H]([C@H]1C(=O)O)O	Organic compounds	Organic acids and derivatives	Carboxylic acids and derivatives	Amino acids, peptides, and analogues
10	CID:194573	-19.62	3-Hydroxymugineic acid	(2S,3R)-1-[(2S,3S)-3-carboxy-3-[[(3S)-3-carboxy-3-hydroxypropyl]amino]-2-hydroxypropyl]-3-hydroxyazetidine-2-carboxylic acid	O[C@H](C(=O)O)CCN[C@@H]([C@H](CN1C[C@H]([C@H]1C(=O)O)O)O)C(=O)O	Organic compounds	Organic acids and derivatives	Carboxylic acids and derivatives	Amino acids, peptides, and analogues
11	CID:13894650	-19.57	gamma-glutamyl-s-methylcysteine	2-amino-5-[(1-carboxy-2-methylsulfanylethyl)amino]-5-oxopentanoic acid	CSC[C@@H](C(=O)O)NC(=O)CC[C@@H](C(=O)O)N	Organic compounds	Organic acids and derivatives	Carboxylic acids and derivatives	Amino acids, peptides, and analogues
12	CID:13894653	-19.52	gamma-l-glutamyl-l-methionine sulfoxide	2-amino-5-[(1-carboxy-3-methylsulfinylpropyl)amino]-5-oxopentanoic acid	O=C(N[C@H](C(=O)O)CC[S@](=O)C)CC[C@@H](C(=O)O)N	Organic compounds	Organic acids and derivatives	Carboxylic acids and derivatives	Amino acids, peptides, and analogues
13	CID:2266	-19.41	Azelaic acid	nonanedioic acid	OC(=O)CCCCCCCC(=O)O	Organic compounds	Lipids and lipid-like molecules	Fatty Acyls	Fatty acids and conjugates
14	CID:5192	-19.1	Sebacic acid	decanedioic acid	OC(=O)CCCCCCCCC(=O)O	Organic compounds	Lipids and lipid-like molecules	Fatty Acyls	Fatty acids and conjugates
15	CID:21201348	-18.97	N-gamma-glutamyl-s-propylcysteine	2-amino-5-[(1-carboxy-2-propylsulfanylethyl)amino]-5-oxopentanoic acid	CCCSC[C@@H](C(=O)O)NC(=O)CC[C@@H](C(=O)O)N	Organic compounds	Organic acids and derivatives	Carboxylic acids and derivatives	Amino acids, peptides, and analogues
16	CID:5283028	-18.77	Traumatic acid	(E)-dodec-2-enedioic acid	OC(=O)CCCCCCCC/C=C/C(=O)O	Organic compounds	Lipids and lipid-like molecules	Fatty Acyls	Fatty acids and conjugates
17	CID:7009567	-18.68	gamma-glutamylmethionine	(2S)-2-amino-5-[[(1S)-1-carboxy-3-methylsulfanylpropyl]amino]-5-oxopentanoic acid	CSCC[C@@H](C(=O)O)NC(=O)CC[C@@H](C(=O)O)N	Organic compounds	Organic acids and derivatives	Carboxylic acids and derivatives	Amino acids, peptides, and analogues
18	CID:5378860	-16.55	1-(2-Thienyl)-2-propyn-1-one 2,4-dinitrophenyl hydrazone	2,4-dinitro-N-[(Z)-1-thiophen-2-ylprop-2-ynylideneamino]aniline	C#C/C(=N\Nc1ccc(cc1[N+](=O)[O-])[N+](=O)[O-])/c1cccs1	Organic compounds	Benzenoids	Benzene and substituted derivatives	Nitrobenzenes
19	CID:441627	-16.45	Miraxanthin III	4-[2-[2-(4-hydroxyphenyl)ethylamino]ethenyl]-2,3-dihydropyridine-2,6-dicarboxylic acid	Oc1ccc(cc1)CCNC=CC1=CC(=N[C@@H](C1)C(=O)O)C(=O)O	Organic compounds	Organic acids and derivatives	Carboxylic acids and derivatives	Amino acids, peptides, and analogues
20	CID:6439182	-15.98	2-(8,11,14-Heptadecatrienyl)-6-hydroxybenzoic acid	2-[(8E,11E,14E)-heptadeca-8,11,14-trienyl]-6-hydroxybenzoic acid	CC/C=C/C/C=C/C/C=C/CCCCCCCc1cccc(c1C(=O)O)O	Organic compounds	Benzenoids	Benzene and substituted derivatives	Benzoic acids and derivatives
21	CID:44559173	-15.93	Corchorifatty acid F	(10E,15Z)-9,12,13-trihydroxyoctadeca-10,15-dienoic acid	CC/C=C\C[C@H]([C@@H](/C=C/[C@H](CCCCCCCC(=O)O)O)O)O	Organic compounds	Lipids and lipid-like molecules	Fatty Acyls	Lineolic acids and derivatives
22	CID:5281176	-15.35	Betalamic acid	(2S,4E)-4-(2-oxoethylidene)-2,3-dihydro-1H-pyridine-2,6-dicarboxylic acid	O=C/C=C/1\C[C@H](NC(=C1)C(=O)O)C(=O)O	Organic compounds	Organic acids and derivatives	Carboxylic acids and derivatives	Amino acids, peptides, and analogues
23	CID:441617	-15.28	Indicaxanthin	(2S)-1-[2-[(2S)-2,6-dicarboxy-2,3-dihydro-1H-pyridin-4-ylidene]ethylidene]pyrrolidin-1-ium-2-carboxylate	OC(=O)[C@@H]1CC(=C/C=[N+]\2/CCC[C@H]2C(=O)[O-])C=C(N1)C(=O)O	Organic compounds	Organic acids and derivatives	Carboxylic acids and derivatives	Amino acids, peptides, and analogues
24	CID:119250	-15.16	Epoxyoleic acid	8-[(2S,3R)-3-octyloxiran-2-yl]octanoic acid	CCCCCCCC[C@H]1O[C@H]1CCCCCCCC(=O)O	Organic compounds	Lipids and lipid-like molecules	Fatty Acyls	Lineolic acids and derivatives
25	CID:441449	-15.1	10,16-dihydroxyhexadecanoic acid	10,16-dihydroxyhexadecanoic acid	OCCCCCC[C@@H](CCCCCCCCC(=O)O)O	Organic compounds	Lipids and lipid-like molecules	Fatty Acyls	Fatty acids and conjugates
26	CID:14259006	-14.85	9,16-dihydroxyhexadecanoic acid	9,16-dihydroxyhexadecanoic acid	OCCCCCCC[C@@H](CCCCCCCC(=O)O)O	Organic compounds	Lipids and lipid-like molecules	Fatty Acyls	Fatty acids and conjugates

## Sheet: Table S2
Table S2: List of 24 hits from chemical classes “Carboxylic acids and derivatives”, “Fatty Acyls” and “Benzene and substituted derivatives”. For each of the 24 hits, the table gives the PubChem chemical identifier, predicted chemical class from ClassyFire and predicted toxicity class from ProTox-II. Note, only hits with predicted toxicity class 5 or class 6 are considered non-toxic and the corres…
Serial number	PubChem chemical identifier	Predicted chemical class from ClassyFire	Predicted toxicity class from ProTox-II
1	CID:189811	Carboxylic acids and derivatives	6
2	CID:16070023	Carboxylic acids and derivatives	6
3	CID:11954190	Carboxylic acids and derivatives	6
4	CID:194573	Carboxylic acids and derivatives	6
5	CID:119250	Fatty Acyls	6
6	CID:161197	Carboxylic acids and derivatives	5
7	CID:13894650	Carboxylic acids and derivatives	5
8	CID:13894653	Carboxylic acids and derivatives	5
9	CID:21201348	Carboxylic acids and derivatives	5
10	CID:7009567	Carboxylic acids and derivatives	5
11	CID:5281176	Carboxylic acids and derivatives	5
12	CID:5283028	Fatty Acyls	5
13	CID:5378860	Benzene and substituted derivatives	4
14	CID:6439182	Benzene and substituted derivatives	4
15	CID:13116441	Carboxylic acids and derivatives	4
16	CID:5281218	Carboxylic acids and derivatives	4
17	CID:135438592	Carboxylic acids and derivatives	4
18	CID:441627	Carboxylic acids and derivatives	4
19	CID:441617	Carboxylic acids and derivatives	4
20	CID:2266	Fatty Acyls	4
21	CID:5192	Fatty Acyls	4
22	CID:44559173	Fatty Acyls	4
23	CID:441449	Fatty Acyls	4
24	CID:14259006	Fatty Acyls	4

## Sheet: Table S3
Table S3: Physicochemical, drug-likeness and ADMET properties for the list of 5 potential phytochemical inhibitors of the endoN identified in this study. For each phytochemical, the table gives the phytochemical symbol, PubChem chemical identifier, chemical structure in SMILES format; physicochemical properties such as Molecular weight in g/mol, LogP (Partition coefficient), MolarRefractivity, TP…
Phytochemical symbol	PubChem chemical identifier	SMILES	Physicochemical properties										Drug-likeness properties					Absorption and Distribution							Metabolism						Toxicity
			Molecular weight (g/mol)	LogP	Molar Refractivity	TPSA (Å²)	Number of hydrogen bond donors	Number of hydrogen bond acceptors	Total number of Atoms	Number of rotatable bonds	Shape complexity	Stereochemical complexity	Lipinski RO5 filter	QEDw	QEDuw	Leadlikeness, number of violations predicted by SwissADME	Synthetic accessibility predicted by SwissADME	Solubility class predicted by SwissADME using ESOL method	Solubility class predicted by SwissADME using method by Ali et al	Solubility class predicted by SwissADME using Silicos-IT	Gasterointestinal absorption predicted by SwissADME	Skin permeation predicted by SwissADME (log Kp cm/s)	Blood Brain Barrier permeation predicted by SwissADME	Bioavailability Score predicted by SwissADME	P-glycoprotein substrate predicted by SwissADME	Cytochrome P450 1A2 inhibitor predicted by SwissADME	Cytochrome P450 2C19 inhibitor predicted by SwissADME	Cytochrome P450 2C9 inhibitor predicted by SwissADME	Cytochrome P450 2D6 inhibitor predicted by SwissADME	Cytochrome P450 3A4 inhibitor predicted by SwissADME	PAINS:Number of alerts predicted by SwissADME
L1	161197	O=C(N[C@H](C(=O)O)CC(=O)O)CC[C@@H](C(=O)O)N	262.218	-1.7774	56.6645	167.02	5	5	32	8	0.56	0.22	Passed	0.341917	0.26305	1	2.88	Highly soluble	Highly soluble	Soluble	Low	-11.19	No	0.11	No	No	No	No	No	No	0
L2	189811	O[C@H](C(=O)O)CCN[C@H](C(=O)O)CCN1CC[C@H]1C(=O)O	304.299	-1.5862	69.9169	147.4	5	6	41	10	0.75	0.25	Passed	0.322059	0.251133	1	3.2	Highly soluble	Highly soluble	Soluble	Low	-12.19	No	0.56	Yes	No	No	No	No	No	0
L3	5283028	OC(=O)CCCCCCCC/C=C/C(=O)O	228.288	2.8326	61.3476	74.6	2	2	36	10	0.67	0	Passed	0.445092	0.561183	2	2.56	Soluble	Moderately soluble	Soluble	High	-5.53	Yes	0.56	No	No	No	No	No	No	0
L4	5281176	O=C/C=C/1\C[C@H](NC(=C1)C(=O)O)C(=O)O	211.173	-0.4733	49.0423	103.7	3	4	24	3	0.22	0.11	Passed	0.430245	0.473255	1	3.58	Very soluble	Very soluble	Soluble	High	-7.81	No	0.56	No	No	No	No	No	No	0
L5	119250	CCCCCCCC[C@H]1O[C@H]1CCCCCCCC(=O)O	298.467	5.3197	86.6088	49.83	1	2	55	15	0.94	0.11	Passed	0.328645	0.438951	2	3.63	Moderately soluble	Poorly soluble	Moderately soluble	High	-3.76	Yes	0.56	No	Yes	No	Yes	Yes	No	0
